# Supplementary material for: Synthesis of Novel Acetamidobenzanilides Derivatives as Potencial Trypanocidal Agents
Source: Research Square preprint supplement (doi:10.21203/rs.3.rs-4415338/v1), 2024-05-27
Supplement: Supplementary file 1 [file 4e84d45f828c04b2a6b76160.docx]

**Scheme 1**: Synthesis of *N*-(2-[*N’*-acetamidomethyl])benzanilides derivatives in a four steps process.
