# Supplementary material for: Synthesis of Novel Acetamidobenzanilides Derivatives as Potencial Trypanocidal Agents
Source: Research Square preprint supplement (doi:10.21203/rs.3.rs-4415338/v1), 2024-05-27
Supplement: Supplementary file 2 [file 70799c840ae4f312355e80f3.docx]

**Scheme 3**: 1H-NMR of compound **5b** showing the C**H**2 signals as two doublets due to the two diastereotopic hydrogens.
