# Supplementary material for: Synthesis of Novel Acetamidobenzanilides Derivatives as Potencial Trypanocidal Agents
Source: Research Square preprint supplement (doi:10.21203/rs.3.rs-4415338/v1), 2024-05-27
Supplement: Supplementary file 3 [file ea9eef6e5316742e1b4610ae.docx]

**Scheme 2**: C-NRH and C-NRR’quiral axes and atropisomers of compounds **5**
